# Supplementary material for: Using of Essential Oils and Plant Extracts against Pseudomonas savastanoi pv. glycinea and Curtobacterium flaccumfaciens pv. flaccumfaciens on Soybean
Source: MDPI journal article supplement (doi:10.3390/plants11212989), 2022-11-05
Supplement: s1 [file s1]

Article

# Using of Essential Oils and Plant Extracts against *Pseudomonas savastanoi* pv. *glycinea* and *Curtobacterium flaccumfaciens* pv. *flaccumfaciens* on Soybean

Rashit Tarakanov, Fevzi S.-U. Dzhalilov

Department of Plant Protection, Russian State Agrarian University—Moscow Timiryazev Agricultural Academy, Timiryazevskaya Str. 49, 127434 Moscow, Russia

\* Correspondence: tarakanov.rashit@mail.ru (R.T.); labzara@mail.ru (F.S.-U.D.)

## Supplementary material.

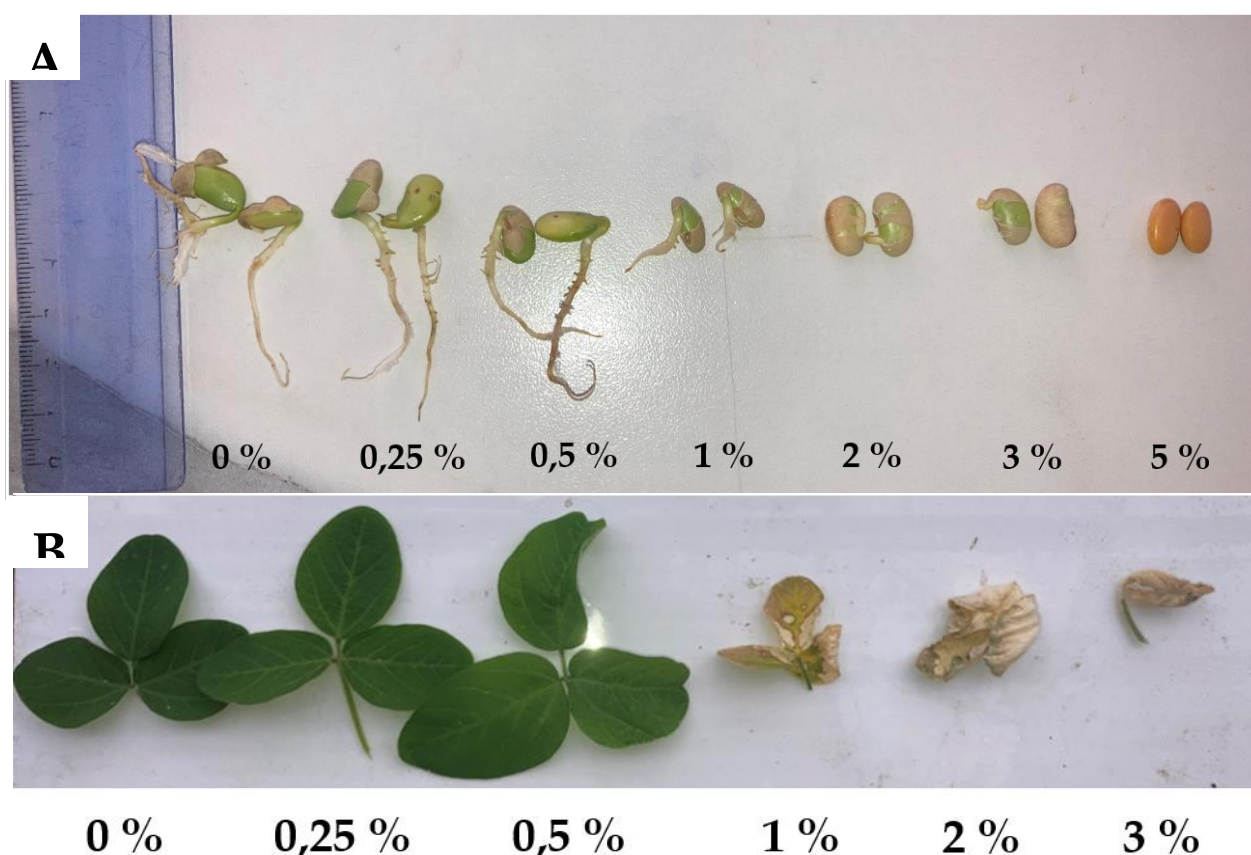

**Supplementary Figure S1.** Phytotoxicity on seedlings by soaking seeds in an aqueous solution (A) and treating soybean leaves (B) with various concentrations of Chinese cinnamon EO. Shown are 2 typical seeds (8 DAT) and 1 trifoliate leaf (7 DAT) from each sample before counting.

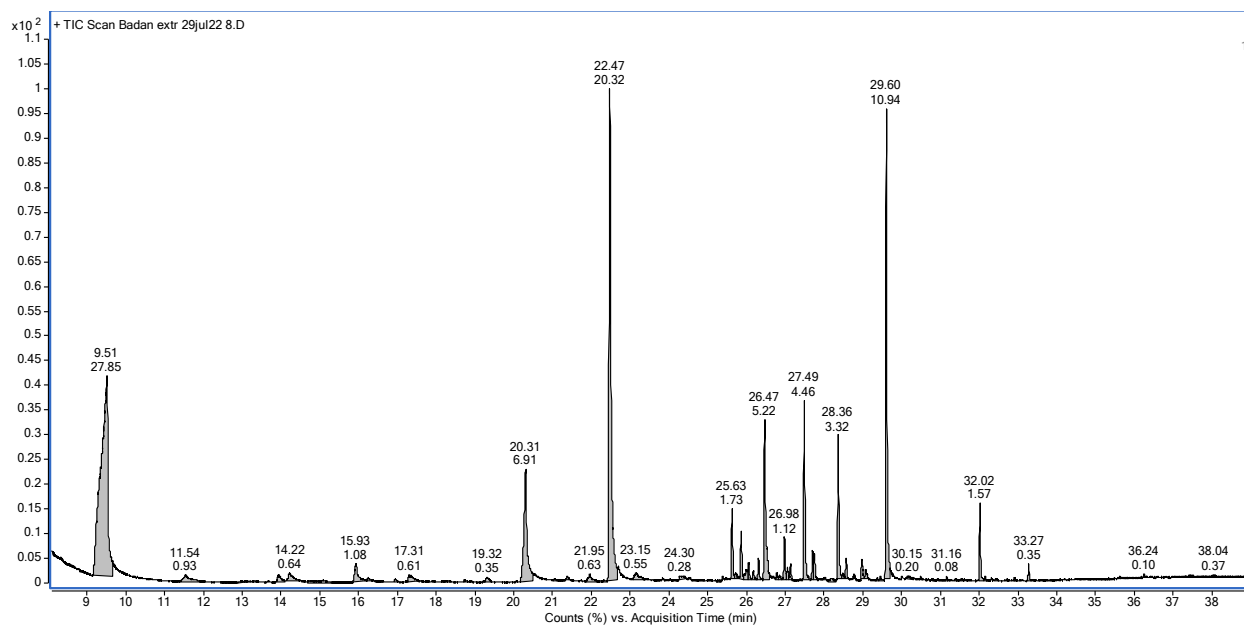

**Supplementary Figure S2.** Chromatographic profile of ethanolic extract of leather bergenia using a mass spectrometric detector.

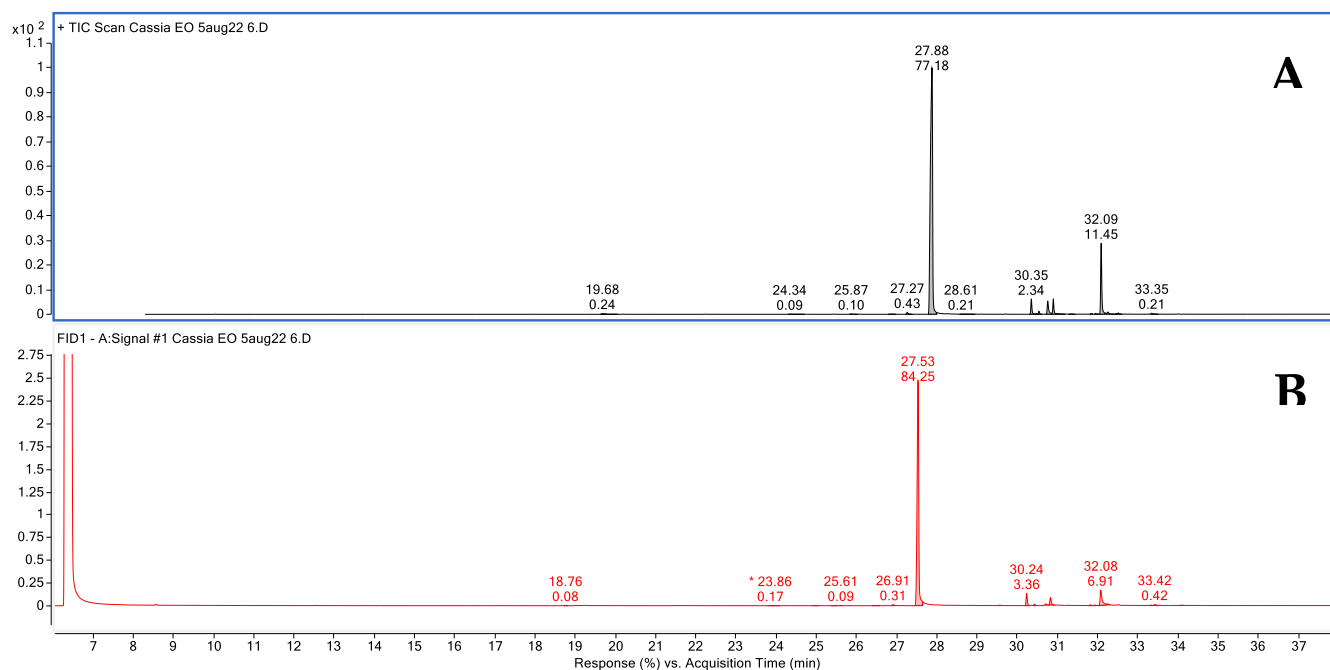

**Supplementary Figure S3.** Chromatographic profile of chinese cinnamon EO using MSD (A) and FID (B).

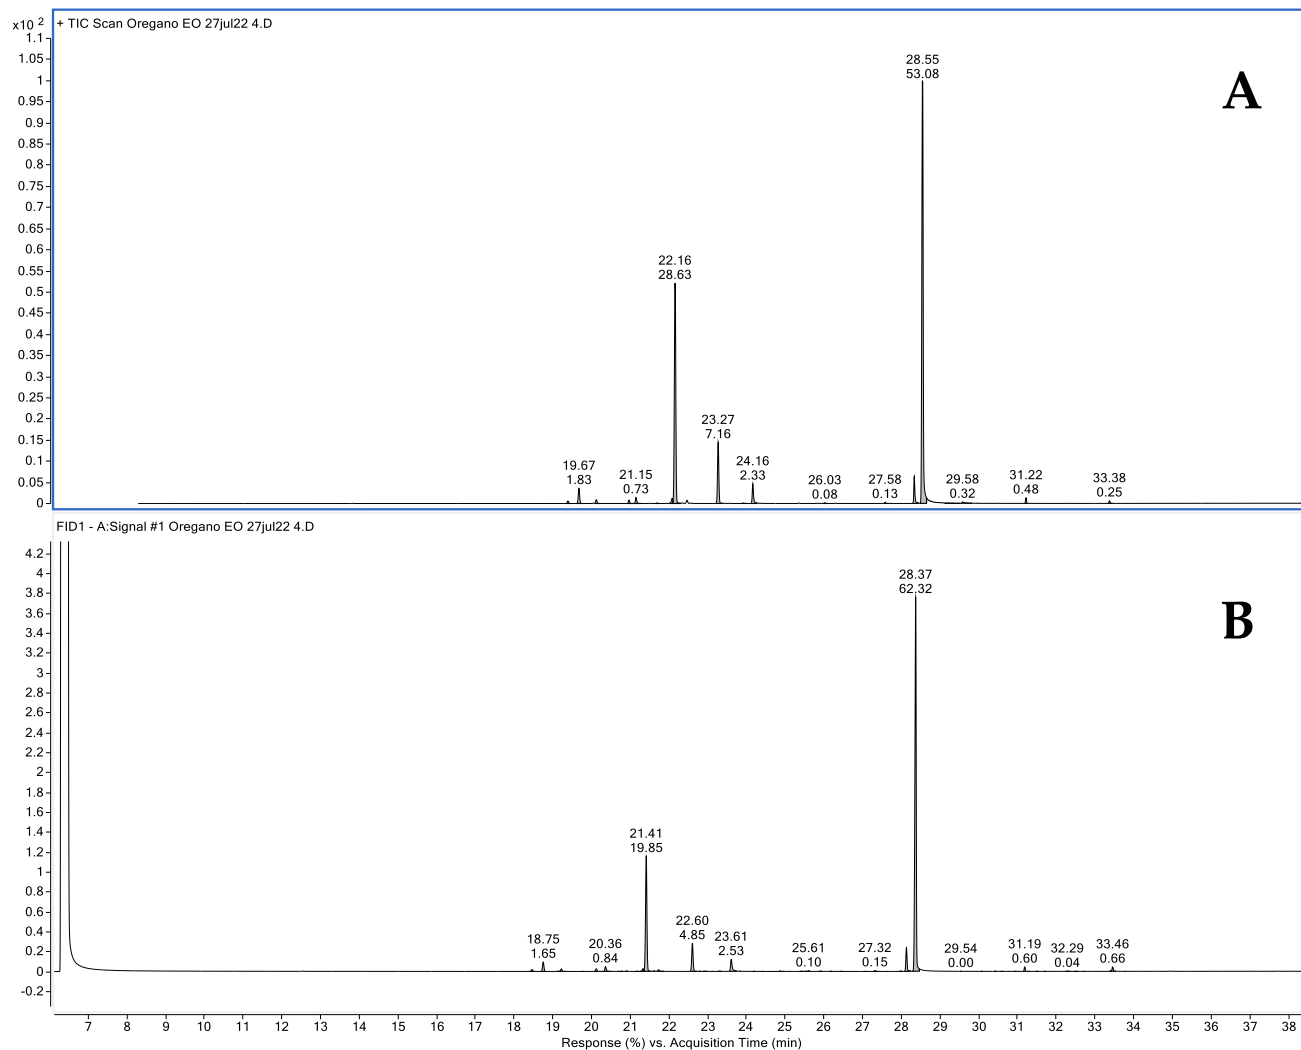

**Supplementary Figure S4.** Chromatographic profile of oregano EO using MSD (A) and FID (B).

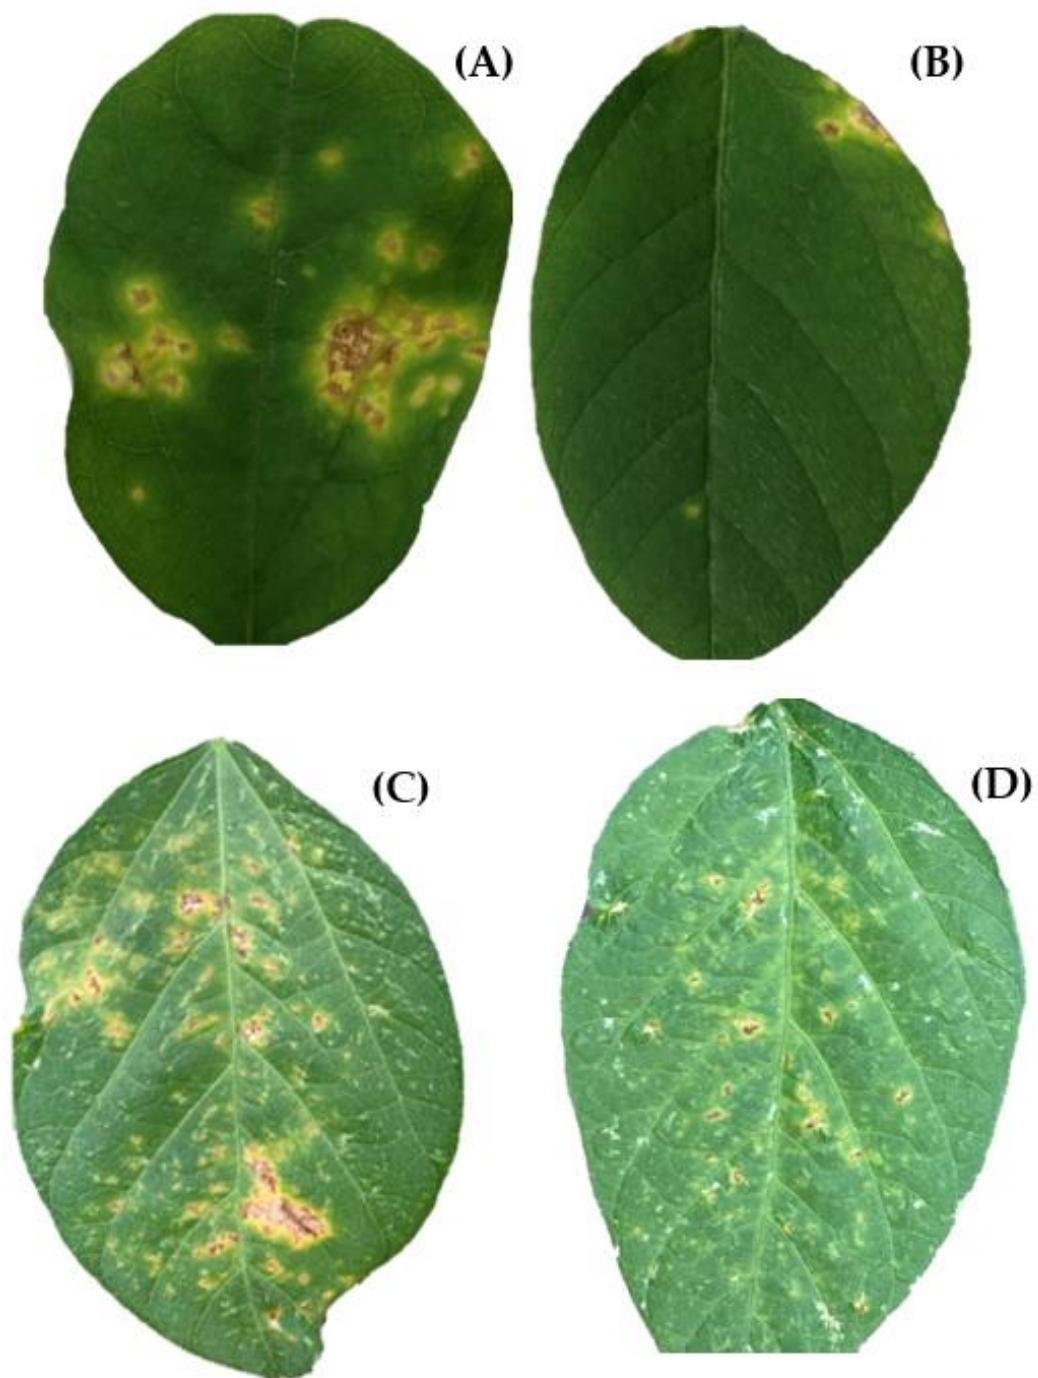

**Supplementary Figure S5.** Symptoms of Psg and Cff on soybean leaves 12 days after inoculation with an airbrush. (A) positive control (water treatment of infected leaves; Psg infection); (B) treatment with CCEO (Psg infection); (C) positive control (water treatment of infected leaves; Cff infection); (D) treatment with OEO (Cff infection). Typical leaves from the samples are presented.

**Supplementary Table S1.** The activity of essential oils, plant extracts, antibiotics, and reference pesticides against *Pseudomonas savastanoi* pv. *glycinea* and *Curtobacterium flaccumfaciens* pv. *flaccumfaciens* strains were measured as growth inhibition zones in the agar-well diffusion method. M – mean; SD – standard deviation; a-e – the same letter is not significantly different (ANOVA.  $\alpha = 0.05$ ; Tukey's test.  $\alpha = 0.05$ ). Solvents for extracts: ETH – 96% ethanol, W- water.

| EO/PE/<br>antibiotic/<br>reference pesticide | Strain | Bacteria growth inhibition zone M±SD, mm |                       |                       |                       |                       |                       |
|----------------------------------------------|--------|------------------------------------------|-----------------------|-----------------------|-----------------------|-----------------------|-----------------------|
|                                              |        | Psg strains                              |                       |                       | Cff strains           |                       |                       |
|                                              |        | CFBP 2214                                | G2                    | G17                   | CFBP 3418             | F-125-1               | F-30-1                |
| gentamicin                                   |        | 22.7±0.5 <sup>e</sup>                    | 21.7±0.5 <sup>e</sup> | 22.7±0.5 <sup>e</sup> | 20.7±0.5 <sup>e</sup> | 20.7±0.5 <sup>e</sup> | 20.3±0.5 <sup>e</sup> |
| thiram                                       |        | 4.3±0.5 <sup>c</sup>                     | 4.3±0.5 <sup>c</sup>  | 4.3±0.5 <sup>c</sup>  | 6.3±0.5 <sup>d</sup>  | 6.3±0.5 <sup>d</sup>  | 6.3±0.5 <sup>d</sup>  |
| Essential oils                               |        |                                          |                       |                       |                       |                       |                       |
| <i>Cinnamomum aromaticum</i>                 |        | 9.7±0.5 <sup>d</sup>                     | 9.0±0 <sup>d</sup>    | 9.7±0.5 <sup>d</sup>  | 2.0±0 <sup>b</sup>    | 2.3±0.5 <sup>b</sup>  | 2.0±0 <sup>b</sup>    |
| <i>Thymus vulgaris</i>                       |        | 2.7±0.5 <sup>b</sup>                     | 2.7±0.5 <sup>b</sup>  | 2.7±0.5 <sup>b</sup>  | 5.7±0.5 <sup>c</sup>  | 5.7±0.5 <sup>c</sup>  | 5.7±0.5 <sup>c</sup>  |
| <i>Origanum vulgare</i>                      |        | 2.0±0.8 <sup>b</sup>                     | 2.0±0.8 <sup>b</sup>  | 2.0±0.8 <sup>b</sup>  | 8.3±0.5 <sup>cd</sup> | 8.3±0.5 <sup>cd</sup> | 8.0±0 <sup>cd</sup>   |
| <i>Mentha piperita</i>                       |        | 1.3±0.5 <sup>b</sup>                     | 1.3±0.5 <sup>b</sup>  | 1.3±0.5 <sup>b</sup>  | 4.7±0.5 <sup>b</sup>  | 4.0±0.8 <sup>b</sup>  | 4.7±0.5 <sup>b</sup>  |
| <i>Allium sativum</i>                        |        | 0±0 <sup>a</sup>                         | 0±0 <sup>a</sup>      | 0±0 <sup>a</sup>      | 3.7±0.5 <sup>c</sup>  | 3.7±0.5 <sup>c</sup>  | 3.7±0.5 <sup>c</sup>  |
| <i>Acorus calamus</i>                        |        | 5.7±0.5 <sup>c</sup>                     | 6.0±0 <sup>c</sup>    | 5.7±0.5 <sup>c</sup>  | 0±0 <sup>a</sup>      | 0±0 <sup>a</sup>      | 0±0 <sup>a</sup>      |
| <i>Mentha longifolia</i>                     |        | 2.7±0.5 <sup>b</sup>                     | 2.7±0.5 <sup>b</sup>  | 2.7±0.5 <sup>b</sup>  | 4.3±0.5 <sup>b</sup>  | 4.7±0.5 <sup>b</sup>  | 4.3±0.5 <sup>b</sup>  |
| <i>Citrus aurantiifolia</i>                  |        | 6.0±0 <sup>d</sup>                       | 6.0±0 <sup>d</sup>    | 6.0±0 <sup>d</sup>    | 0±0 <sup>a</sup>      | 0±0 <sup>a</sup>      | 0±0 <sup>a</sup>      |
| <i>Syzygium aromaticum</i>                   |        | 9.3±0.5 <sup>d</sup>                     | 9.0±0.5 <sup>d</sup>  | 9.3±0.5 <sup>d</sup>  | 0±0 <sup>a</sup>      | 0±0 <sup>a</sup>      | 0±0 <sup>a</sup>      |
| <i>Elettaria cardamomum</i>                  |        | 6.0±0.8 <sup>c</sup>                     | 6.0±0.8 <sup>c</sup>  | 6.0±0.8 <sup>c</sup>  | 0±0 <sup>a</sup>      | 0±0 <sup>a</sup>      | 0±0 <sup>a</sup>      |
| <i>Citrus reticulata</i>                     |        | 6.3±0.5 <sup>c</sup>                     | 6.0±0 <sup>c</sup>    | 6.3±0.5 <sup>c</sup>  | 0±0 <sup>a</sup>      | 0±0 <sup>a</sup>      | 0±0 <sup>a</sup>      |
| <i>Pimpinella anisum</i>                     |        | 5.3±0.5 <sup>c</sup>                     | 5.3±0.5 <sup>c</sup>  | 5.3±0.5 <sup>c</sup>  | 0±0 <sup>a</sup>      | 0±0 <sup>a</sup>      | 0±0 <sup>a</sup>      |
| <i>Lavandula angustifolia</i>                |        | 2.3±0.5 <sup>b</sup>                     | 2.3±0.5 <sup>b</sup>  | 2.3±0.5 <sup>b</sup>  | 5.3±0.5 <sup>c</sup>  | 5.3±0.5 <sup>c</sup>  | 5.3±0.5 <sup>d</sup>  |
| <i>Ruta graveolens</i>                       |        | 0±0 <sup>a</sup>                         | 0±0 <sup>a</sup>      | 0±0 <sup>a</sup>      | 0±0 <sup>a</sup>      | 0±0 <sup>a</sup>      | 0±0 <sup>a</sup>      |
| <i>Tanacetum vulgare</i>                     |        | 0±0 <sup>a</sup>                         | 0±0 <sup>a</sup>      | 0±0 <sup>a</sup>      | 0±0 <sup>a</sup>      | 0±0 <sup>a</sup>      | 0±0 <sup>a</sup>      |
| <i>Rosmarinus officinalis</i>                |        | 3.3±0.5 <sup>b</sup>                     | 3.0±0.8 <sup>b</sup>  | 2.3±0.6 <sup>b</sup>  | 0±0 <sup>a</sup>      | 0±0 <sup>a</sup>      | 0±0 <sup>a</sup>      |
| <i>Achillea millefolium</i>                  |        | 3.0±0 <sup>b</sup>                       | 4.0±0.8 <sup>b</sup>  | 2.7±0.6 <sup>b</sup>  | 3.3±0.5 <sup>b</sup>  | 3.0±1.0 <sup>b</sup>  | 3.0±0 <sup>b</sup>    |
| <i>Foeniculum vulgare</i>                    |        | 5.3±0.5 <sup>d</sup>                     | 5.7±0.5 <sup>d</sup>  | 6.3±0.6 <sup>d</sup>  | 0±0 <sup>a</sup>      | 0±0 <sup>a</sup>      | 0±0 <sup>a</sup>      |
| <i>Salvia officinalis</i>                    |        | 0±0 <sup>a</sup>                         | 0±0 <sup>a</sup>      | 0±0 <sup>a</sup>      | 4.3±0.5 <sup>b</sup>  | 4.0±0 <sup>b</sup>    | 4.3±0.5 <sup>b</sup>  |
| Extracts                                     |        |                                          |                       |                       |                       |                       |                       |
| <i>Phellodendron amurense</i>                | ETH    | 2.0±0 <sup>b</sup>                       | 1.7±0.5 <sup>b</sup>  | 1.7±0.5 <sup>b</sup>  | 1.7±0.5 <sup>b</sup>  | 1.7±0.5 <sup>b</sup>  | 1.7±0.5 <sup>c</sup>  |
|                                              | W      | 0±0 <sup>a</sup>                         | 0±0 <sup>a</sup>      | 0±0 <sup>a</sup>      | 0±0 <sup>a</sup>      | 0±0 <sup>a</sup>      | 0±0 <sup>a</sup>      |
| <i>Bergenia crassifolia</i>                  | ETH    | 5.0±0 <sup>c</sup>                       | 5.3±0.5 <sup>b</sup>  | 5.3±0.5 <sup>c</sup>  | 6.0±0 <sup>c</sup>    | 6.0±0 <sup>c</sup>    | 6.3±0.5 <sup>c</sup>  |
|                                              | W      | 0±0 <sup>a</sup>                         | 0±0 <sup>a</sup>      | 0±0 <sup>a</sup>      | 0±0 <sup>a</sup>      | 0±0 <sup>a</sup>      | 0±0 <sup>a</sup>      |
| <i>Capsicum annuum</i>                       | ETH    | 1.7±0.9 <sup>b</sup>                     | 1.3±0.5 <sup>b</sup>  | 1.3±0.5 <sup>b</sup>  | 0±0 <sup>a</sup>      | 0±0 <sup>a</sup>      | 0±0 <sup>a</sup>      |
|                                              | W      | 1.7±0.5 <sup>b</sup>                     | 1.7±0.5 <sup>b</sup>  | 1.7±0.5 <sup>b</sup>  | 1.7±0.5 <sup>b</sup>  | 1.7±0.5 <sup>b</sup>  | 1.3±0.5 <sup>c</sup>  |
| <i>Galega officinalis</i>                    | ETH    | 0±0 <sup>a</sup>                         | 0±0 <sup>a</sup>      | 0±0 <sup>a</sup>      | 0±0 <sup>a</sup>      | 0±0 <sup>a</sup>      | 0±0 <sup>a</sup>      |
|                                              | W      | 1.3±0.5 <sup>b</sup>                     | 1.3±0.5 <sup>b</sup>  | 1.3±0.5 <sup>b</sup>  | 1.7±0.5 <sup>b</sup>  | 1.3±0.5 <sup>b</sup>  | 1.7±0.5 <sup>c</sup>  |
| <i>Artemisia absinthium</i>                  | ETH    | 0±0 <sup>a</sup>                         | 0±0 <sup>a</sup>      | 0±0 <sup>a</sup>      | 0±0 <sup>a</sup>      | 0±0 <sup>a</sup>      | 0±0 <sup>a</sup>      |

|                                 |     |                      |                      |                      |                      |                      |                      |
|---------------------------------|-----|----------------------|----------------------|----------------------|----------------------|----------------------|----------------------|
|                                 | W   | 0±0 <sup>a</sup>     |
| <i>Rosa pendulina</i>           | ETH | 0±0 <sup>a</sup>     |
|                                 | W   | 0±0 <sup>a</sup>     |
| <i>Phytolacca americana</i>     | ETH | 0±0 <sup>a</sup>     |
|                                 | W   | 0±0 <sup>a</sup>     |
| <i>Chelidonium majus</i>        | ETH | 0±0 <sup>a</sup>     | 0±0 <sup>a</sup>     | 0±0 <sup>a</sup>     | 1.7±0.5 <sup>b</sup> | 1.3±0.5 <sup>b</sup> | 1.3±0.5 <sup>c</sup> |
|                                 | W   | 0±0 <sup>a</sup>     |
| <i>Morus nigra</i>              | ETH | 0±0 <sup>a</sup>     | 0±0 <sup>a</sup>     | 0±0 <sup>a</sup>     | 1.3±0.5 <sup>b</sup> | 1.3±0.5 <sup>b</sup> | 1.7±0.5 <sup>c</sup> |
|                                 | W   | 0±0 <sup>a</sup>     |
| <i>Spiraea salicifolia</i>      | ETH | 0±0 <sup>a</sup>     |
|                                 | W   | 0±0 <sup>a</sup>     | 0±0 <sup>a</sup>     | 0±0 <sup>a</sup>     | 1.3±0.5 <sup>b</sup> | 1.3±0.5 <sup>b</sup> | 2.0±0 <sup>c</sup>   |
| <i>Oleum calami</i>             | ETH | 0±0 <sup>a</sup>     | 0±0 <sup>a</sup>     | 0±0 <sup>a</sup>     | 1.3±0.5 <sup>b</sup> | 1.3±0.5 <sup>b</sup> | 2.3±0.5 <sup>b</sup> |
|                                 | W   | 0±0 <sup>a</sup>     | 0±0 <sup>a</sup>     | 0±0 <sup>a</sup>     | 0±0                  | 0±0 <sup>a</sup>     | 0±0 <sup>a</sup>     |
| <i>Melissa officinalis</i>      | ETH | 1.7±0.5 <sup>b</sup> | 1.3±0.5 <sup>b</sup> | 1.3±0.5 <sup>b</sup> | 0±0 <sup>a</sup>     | 0±0 <sup>a</sup>     | 0±0 <sup>a</sup>     |
|                                 | W   | 0±0 <sup>a</sup>     |
| <i>Sambucus nigra</i>           | ETH | 2.0±0 <sup>b</sup>   | 2.0±0 <sup>b</sup>   | 2.0±0.6 <sup>b</sup> | 0±0 <sup>a</sup>     | 0±0 <sup>a</sup>     | 0±0 <sup>a</sup>     |
|                                 | W   | 0±0 <sup>a</sup>     |
| <i>Quercus robur</i>            | ETH | 0±0 <sup>a</sup>     |
|                                 | W   | 0±0 <sup>a</sup>     |
| <i>Reynoutria sachalinensis</i> | ETH | 0±0 <sup>a</sup>     |
|                                 | W   | 0±0 <sup>a</sup>     |
| <i>Tanacetum vulgare</i>        | ETH | 0±0 <sup>a</sup>     |
|                                 | W   | 0±0 <sup>a</sup>     |
| <i>Carum carvi</i>              | ETH | 0±0 <sup>a</sup>     |
|                                 | W   | 0±0 <sup>a</sup>     |
| <i>Juglans mandshurica</i>      | ETH | 0±0 <sup>a</sup>     |
|                                 | W   | 0±0 <sup>a</sup>     |
| <i>Macleaya cordata</i>         | ETH | 0±0 <sup>a</sup>     |
|                                 | W   | 0±0 <sup>a</sup>     |
